# Supplementary material for: Highly efficient oxidation of various thioethers catalyzed by organic ligand-modified polyoxomolybdates
Source: Royal Society of Chemistry journal article supplement (doi:10.1039/c9qi01098j), 2019-10-17
Supplement: c9qi01098j1.pdf [file c9qi01098j1.pdf]

## Supporting Information

### Highly Efficient Oxidation of Various Thioethers Catalyzed by Organic Ligand Modified Polyoxomolybdates

Yujiao Hou, Haiyan An\* Shenzhen Chang, Jie Zhang, Qingshan Zhu

*College of Chemistry, Dalian University of Technology, Dalian 116023, P. R. China*

#### Contents

|                                                                           |           |
|---------------------------------------------------------------------------|-----------|
| <b>I . Supplementary experiments.....</b>                                 | <b>2</b>  |
| <b>II . Supplementary structure figures .....</b>                         | <b>5</b>  |
| <b>III. FT-IR spectroscopy .....</b>                                      | <b>6</b>  |
| <b>IV. UV-Vis spectroscopy .....</b>                                      | <b>7</b>  |
| <b>V. TG analysis and PXRD .....</b>                                      | <b>8</b>  |
| <b>VI. Kinetics Study .....</b>                                           | <b>9</b>  |
| <b>VII. <sup>1</sup>H NMR Data.....</b>                                   | <b>10</b> |
| <b>VIII. Catalytic oxidation study for various organic sulfides .....</b> | <b>16</b> |
| <b>IX. X-Ray Single Crystallography Result .....</b>                      | <b>20</b> |
| <b>X. References .....</b>                                                | <b>22</b> |

## I . Supplementary experiments

### Materials and methods

We used chemicals that were commercially purchased without further purification ( $\text{Na}_2\text{MoO}_4/\text{Na}_2\text{HPO}_3 \cdot 5\text{H}_2\text{O}/\text{PABA}/\text{CoCl}_2 \cdot 6\text{H}_2\text{O}/\text{MnCl}_2 \cdot 2\text{H}_2\text{O}/\text{NiCl}_2 \cdot 6\text{H}_2\text{O}/\text{ZnSO}_4 \cdot 7\text{H}_2\text{O}$  and  $\text{CsCl}$  were purchased from Energy Chemical and J&K Chemicals; Methyl phenyl/1-Methyl-4-(methylthio)benzene/1-Methoxy-4-(methylthio)benzene/4-Chlorothioanisole/4-Fluorothioanisole/benzyl sulfide/phenyl sulfide and 2-chloroethyl ethyl sulfide were purchased from Aladdin and Sigma-Aldrich). Elemental analyses (H and N) were performed on a Perkin-Elmer 2400 CHN elemental analyzer; P, Mo, Co, Mn and Cs were analyzed on a PLASMA-SPEC (I) ICP atomic emission spectrometer. We detected the IR spectra using KBr pellets as the background in the range  $400\text{--}4000\text{ cm}^{-1}$  on an Alpha Centaur FT/IR spectrophotometer. TG analyses were performed in flowing  $\text{N}_2$  at a heating rate of  $10^\circ\text{C min}^{-1}$  on a Perkin-Elmer TGA7 instrument. The PXRD patterns of the samples were recorded on a Rigaku Dmax 2000 X-ray diffractometer with graphite monochromatized Cu-K $\alpha$  radiation ( $\lambda = 0.154\text{ nm}$ ) and  $2\theta$  varying from  $5^\circ$  to  $50^\circ$ . The diffuse reflectivity spectra were performed on finely ground samples with a Cary 500 spectrophotometer equipped with a 110 mm diameter integrating sphere, which were measured from 200 to 800 nm. The GC analysis was performed with an Agilent HP6890 spectrometer with a flame ionization detector, which was used to monitor the conversion and selectivity. GC-MS at the final time point was used to confirm the identity of the products. The

GC–MS spectra were measured on an Agilent HP6890/5973MSD spectrometer. <sup>1</sup>HNMR spectroscopy was also used to monitor conversation and ascertain the product. And <sup>1</sup>HNMR spectra were collected on a 500 MHz Bruker Avance III system in CDCl<sub>3</sub>.

**CAUTION:** The simulant of CWAs CEES, is highly toxic and must be handled only by trained personnel using applicable safety procedures in a closed system or in a hood under good ventilation.

#### **Synthesis of Cs<sub>3</sub>[AsMo<sub>6</sub>O<sub>21</sub>(PABA)<sub>3</sub>]·nH<sub>2</sub>O (5)**

The synthetic procedure was similar to that used for **1** but without metal cations. The filtrate was kept undisturbed for two weeks under ambient conditions, and then light yellow crystals were isolated. FTIR data (cm<sup>-1</sup>): 3367 (s), 1603 (s), 1539 (s), 1411 (s), 1278 (m), 1173(m), 1076(w), 926(m), 890 (w), 779 (m), 675 (s), 568(w), 448 (w).

#### **Synthesis of {CoAsMo<sub>6</sub>(PABA)<sub>3</sub>}**

The synthetic procedure was similar to that used for **1**, with the central hetero material Na<sub>2</sub>HPO<sub>3</sub>·5H<sub>2</sub>O (0.0216 g, 0.1 mmol) alone instead of As<sub>2</sub>O<sub>3</sub> (0.0197 g, 0.1 mmol). The filtrate was kept undisturbed for two weeks under ambient conditions, and then pink crystals were isolated. FTIR data (cm<sup>-1</sup>): 3360 (s), 1607 (s), 1548 (s), 1413 (w), 1271 (m), 1178(m), 923(m), 894(s), 777 (w), 678 (m), 620(w), 512 (m).

#### **Synthesis {CoTeMo<sub>6</sub>(PABA)<sub>3</sub>}**

The synthetic procedur was similar to that used for **1**, with the central hetero material Na<sub>2</sub>HPO<sub>3</sub>·5H<sub>2</sub>O (0.0216 g, 0.1 mmol) alone instead of Na<sub>2</sub>TeO<sub>3</sub> (0.022 g, 0.1

mmol). The filtrate was kept undisturbed for two weeks under ambient conditions, and then pink crystals were isolated. FTIR data (cm<sup>-1</sup>): 3385 (s), 1604 (s), 1533 (s), 1406 (s), 1281 (w), 1178(m), 903(s), 768 (w), 728 (w), 637(s), 513 (w).

### **X-ray crystallography**

A Bruker Smart CCD diffractometer with Mo K $\alpha$  radiation ( $\lambda = 0.71073 \text{ \AA}$ ) was used to collect the crystallographic data of four compounds at 293 K or 220 K by  $\theta$  and  $\omega$  scan modes. The method of empirical absorption correction was adopted. SHELXTL-97 software was used to solve the structures of **1** and **2** and refine the data.<sup>1</sup> In **1** and **2**, most non-H atoms are refined anisotropically, and only some of water molecules were excepted. H atoms linked to the C and N atoms were fixed in their ideal positions. To get reasonable thermal parameters and atom sites, some commands such as “isor” and “dfix” were utilized. Table S8 S9 summarizes the structural determination and crystallographic data for **1** and **2**.

The CCDC reference numbers for compounds **1** and **2** are 1949665 and 1949666.

## II. Supplementary structure figures

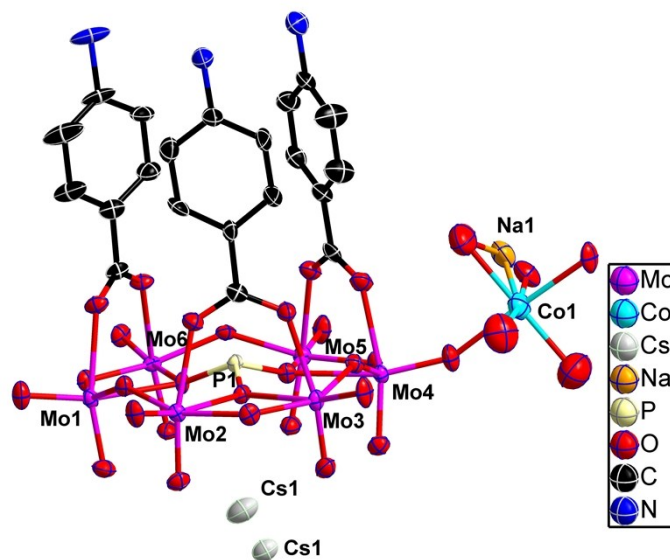

**Fig. S1.** ORTEP drawing of **1** with thermal ellipsoids at 50% probability. Free water molecules are omitted for clarity. (color code: Co light blue, Mo purple, P light yellow, O red, N blue, C black).

### III. FT-IR spectroscopy

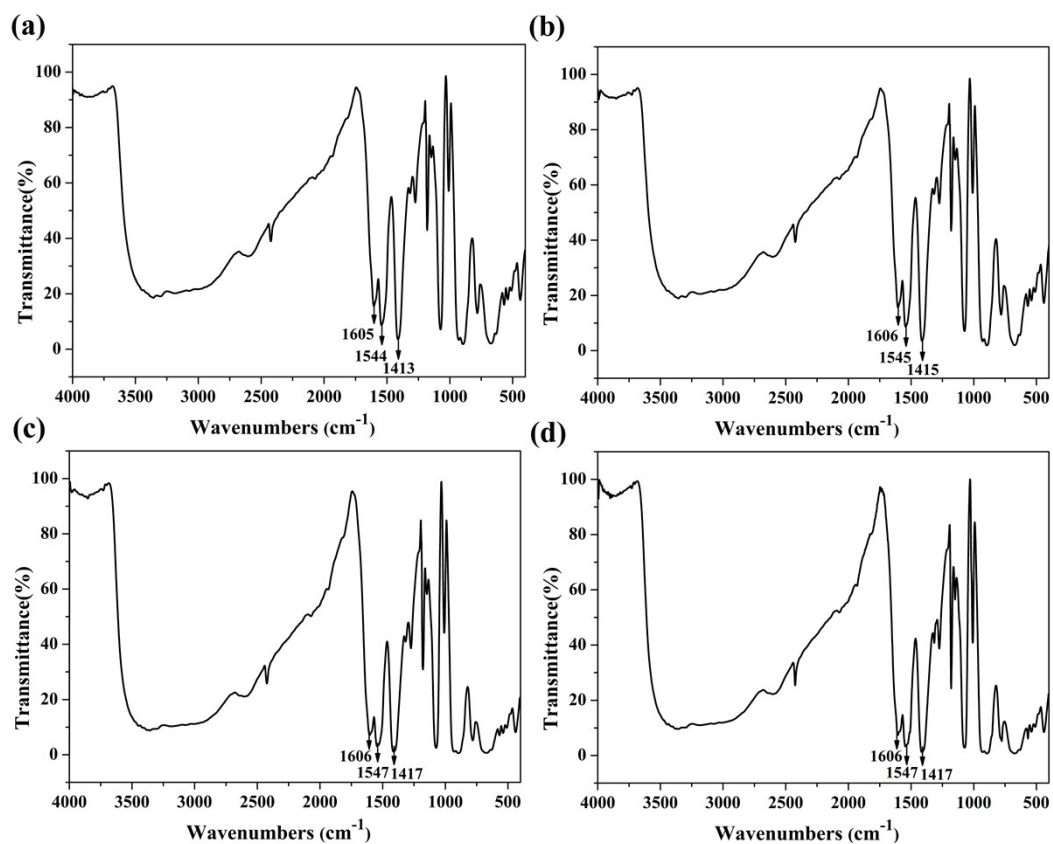

Fig. S2. IR spectra for compounds 1-4.

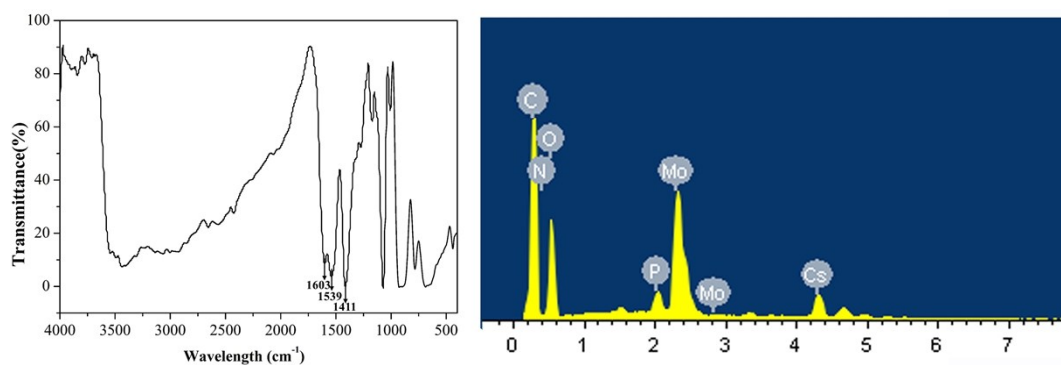

Fig. S3. IR spectrum and EDS data for compound 5.

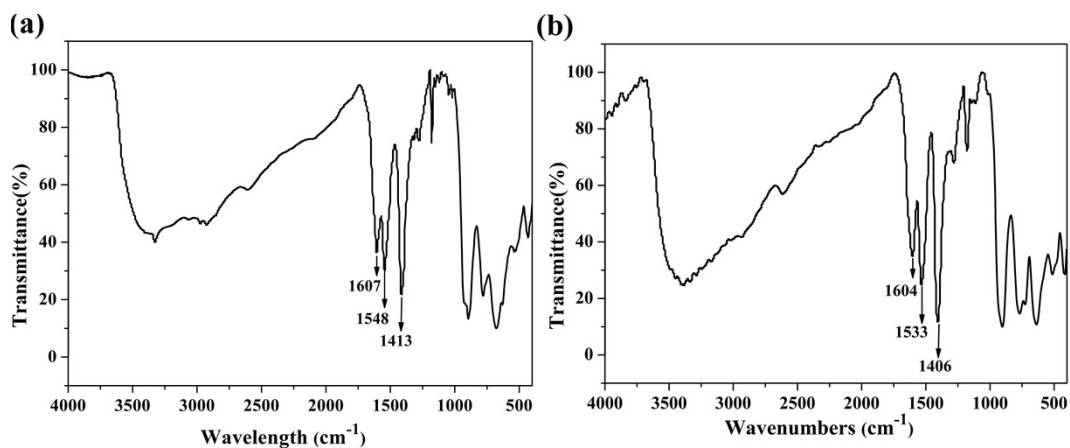

**Fig. S4.** a) IR spectra for  $\{\text{CoAsMo}_6(\text{PABA})_3\}$ ; b) IR spectra for  $\{\text{CoTeMo}_6(\text{PABA})_3\}$ .

#### IV. UV-Vis spectroscopy

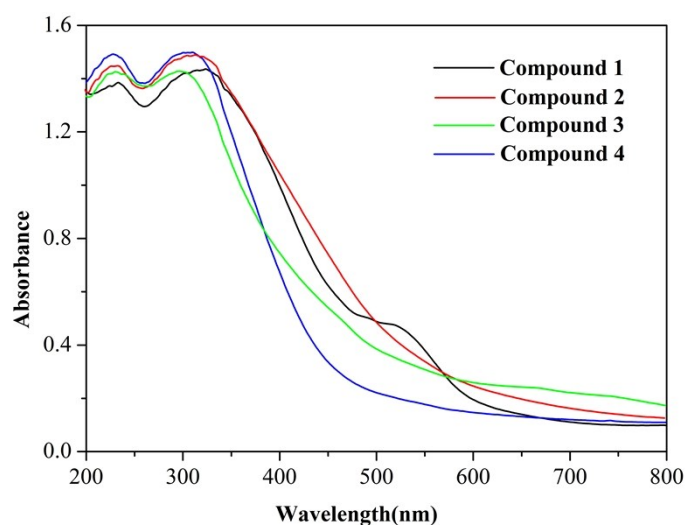

**Fig. S5.** UV-vis diffuse reflectance spectra of compounds 1-4.

## V. TG analysis and PXRD

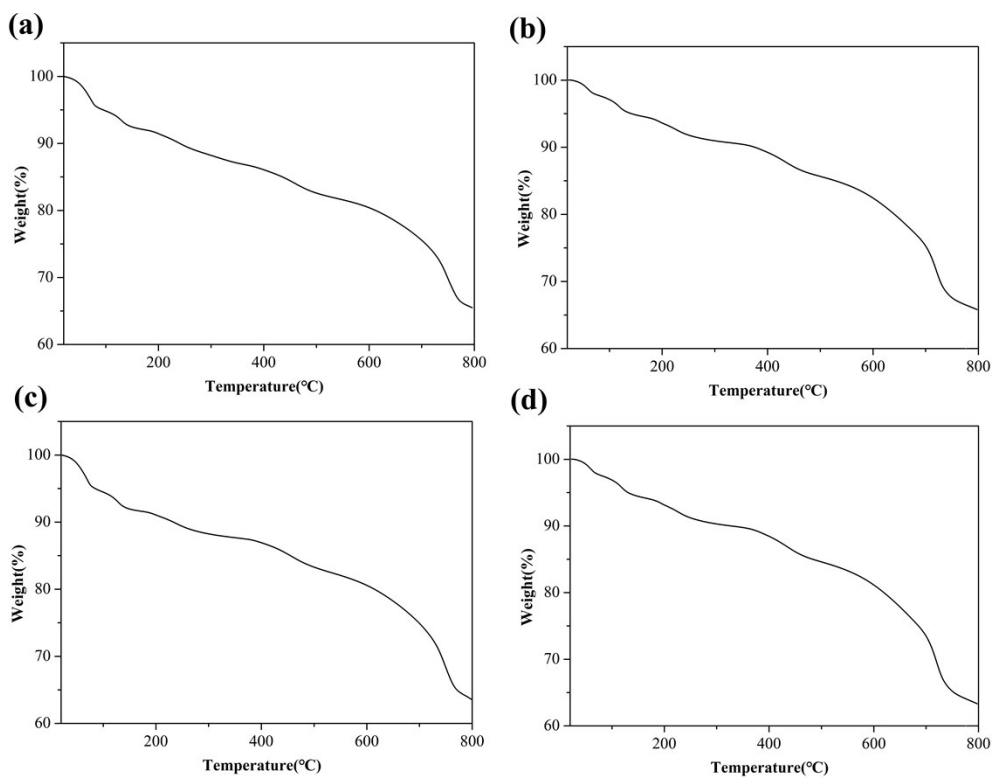

**Fig. S6.** Thermogravimetric plots of compounds 1-4.

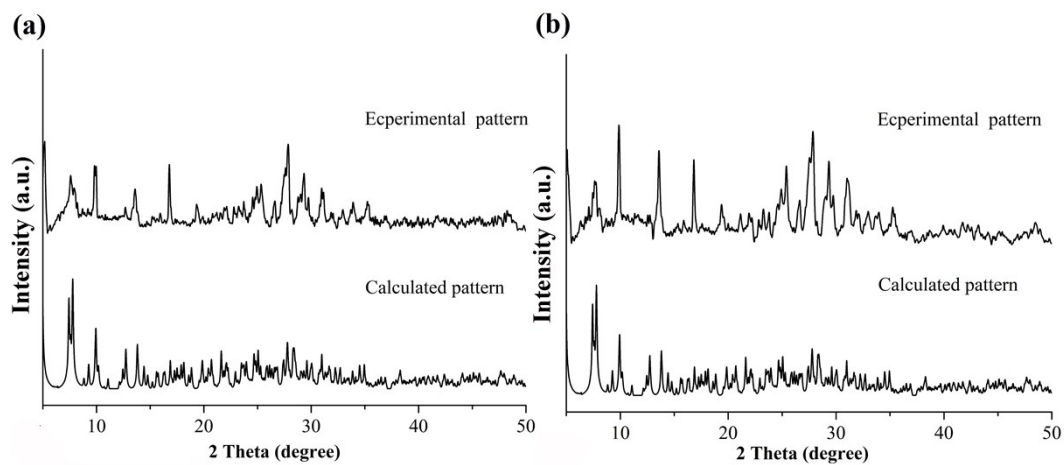

**Fig. S7.** a, b) The calculated and experimental PXRD patterns for compounds 1 and 2.



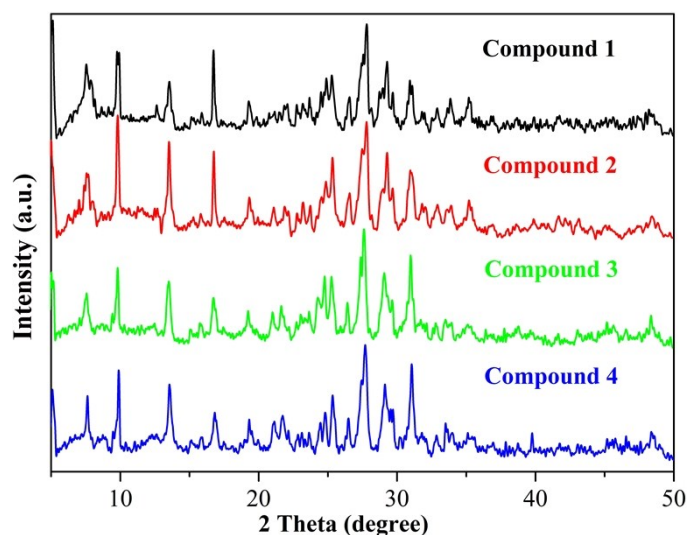

Fig. S8. The comparison of the experimental PXRD among compounds 1-4.

## VI. Kinetics Study

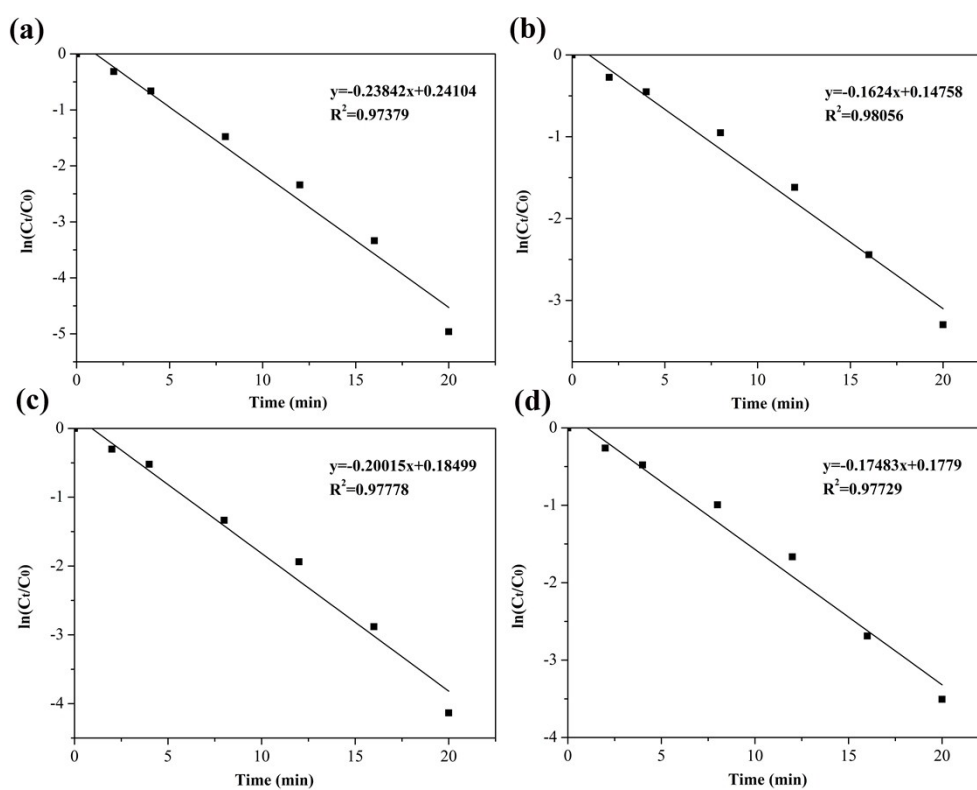

Fig. S9 a, b, c, d) Kinetic analysis of methyl phenyl sulfide oxidation for compounds 1-4 ( $\ln(C_t/C_0)$  versus reaction time,  $C_t$  and  $C_0$  represent the concentration of methyl phenyl sulfide at some time and at the starting time).

## VII. <sup>1</sup>H NMR Data

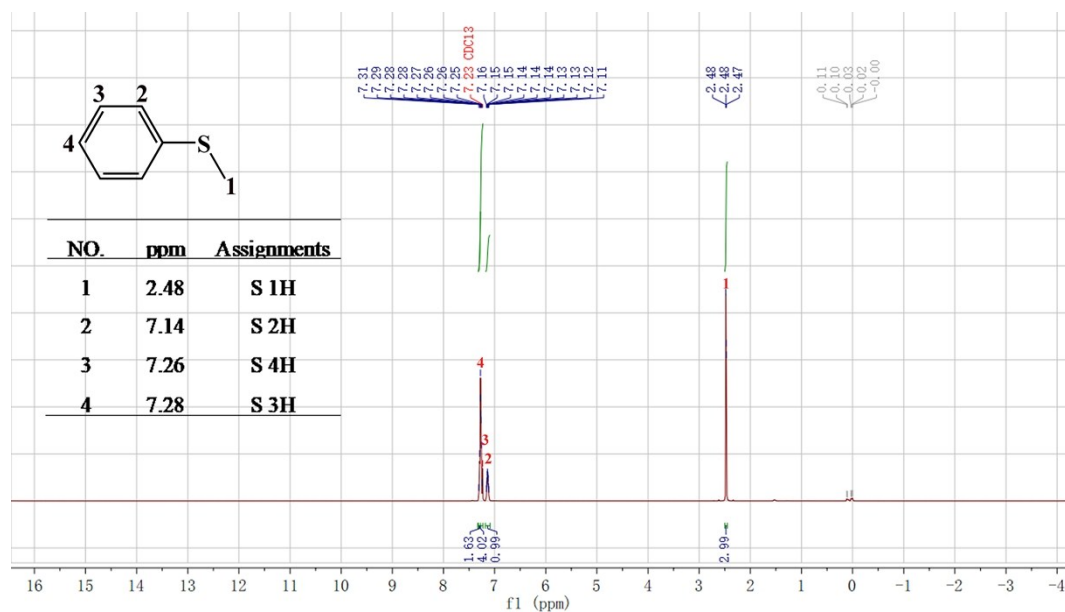

Fig. S10 <sup>1</sup>H NMR Data for methyl phenyl sulfide.

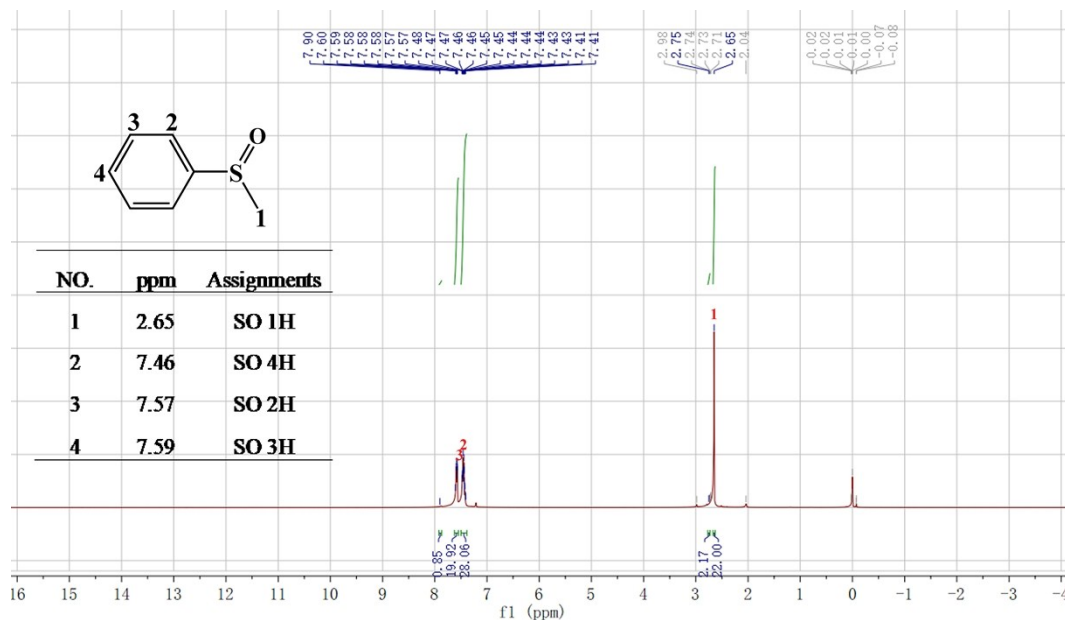

Fig. S11 <sup>1</sup>H NMR Data for methyl phenyl sulfoxide.

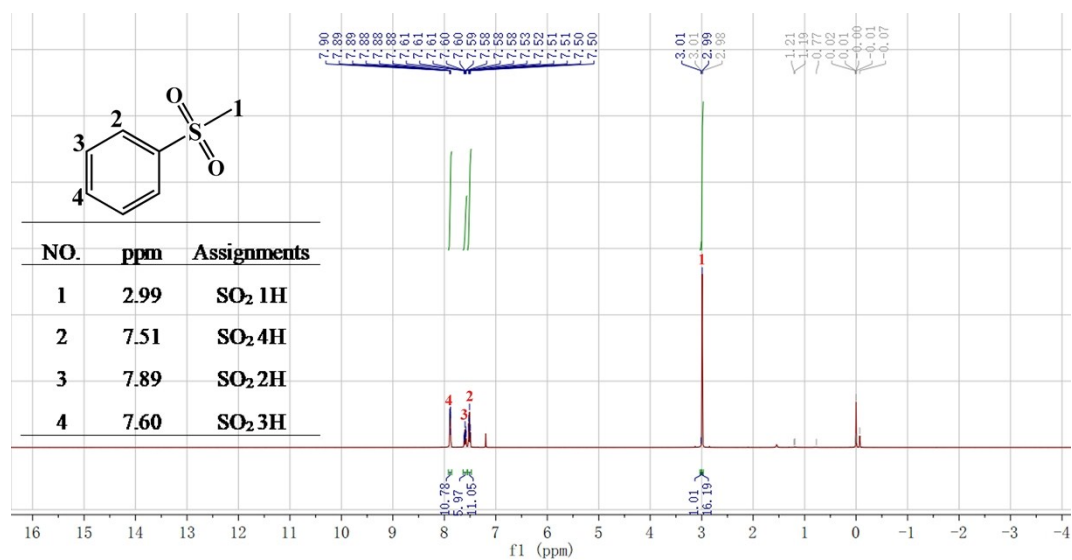

Fig. S12 <sup>1</sup>H NMR Data for methyl phenyl sulfone.

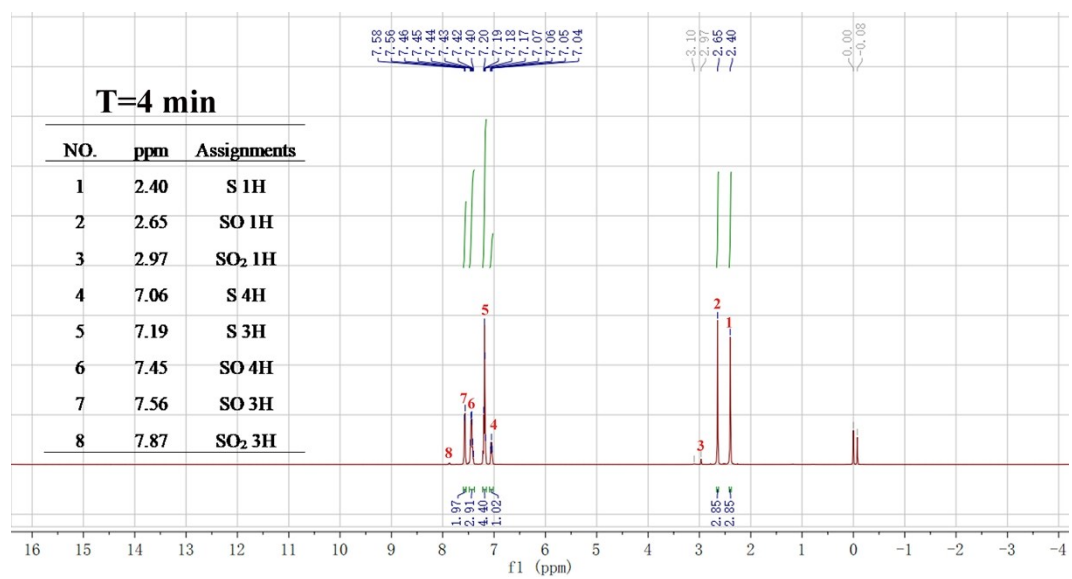

Fig. S13 <sup>1</sup>H NMR Data for oxidation of methyl phenyl sulfide at 4 min.

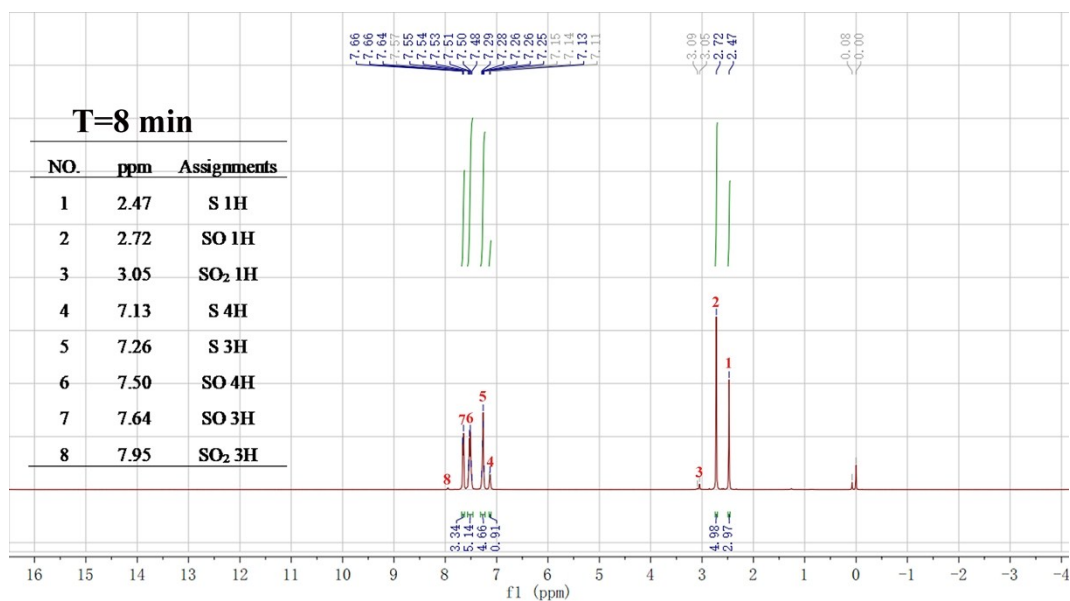

Fig. S14 <sup>1</sup>H NMR Data for oxidation of methyl phenyl sulfide at 8 min.

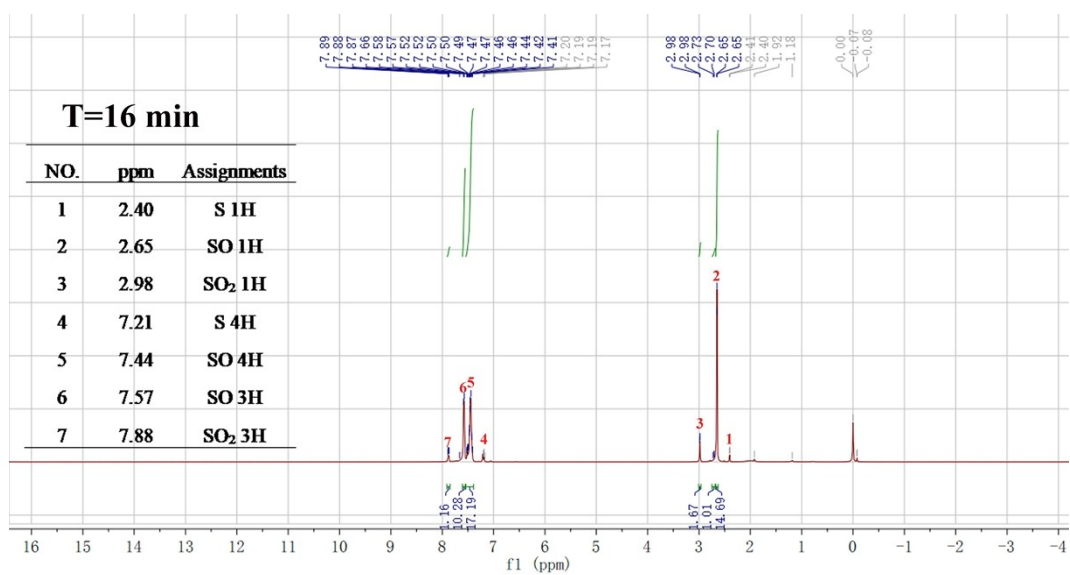

Fig. S15 <sup>1</sup>H NMR Data for oxidation of methyl phenyl sulfide at 16 min.

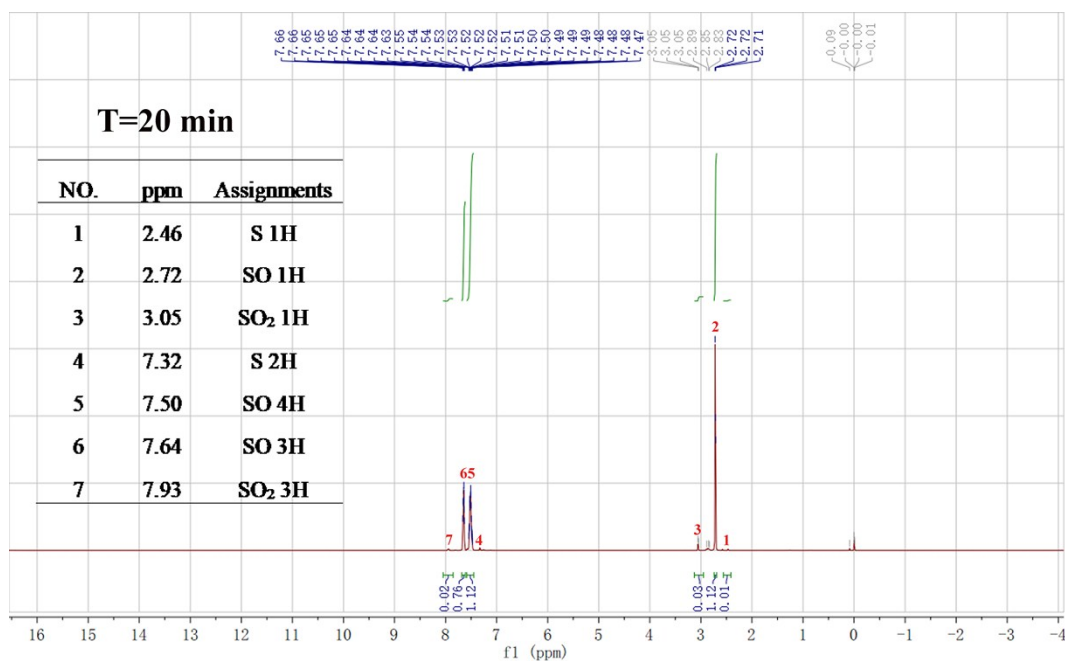

**Fig. S16 <sup>1</sup>H NMR Data for oxidation of methyl phenyl sulfide at 20 min.**

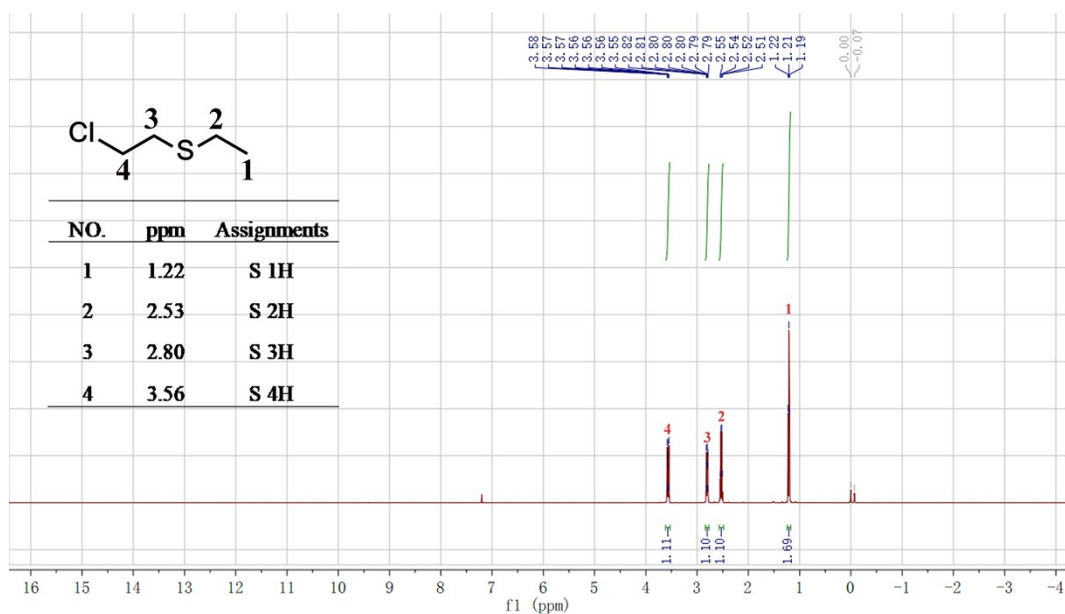

**Fig. S17 <sup>1</sup>H NMR Data for CEES.**

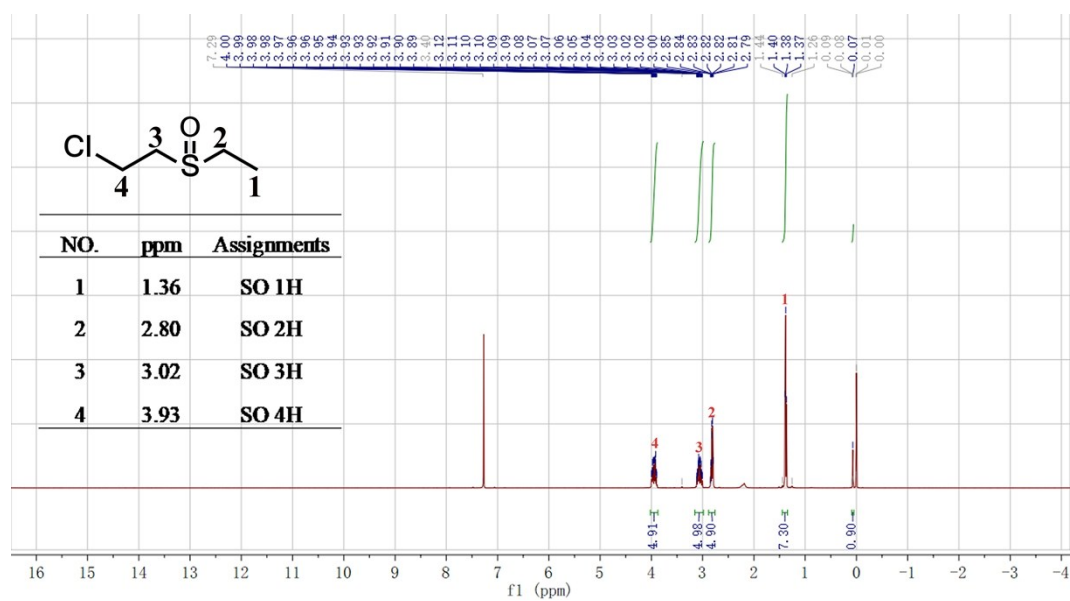

Fig. S18 <sup>1</sup>H NMR Data for CEESO.

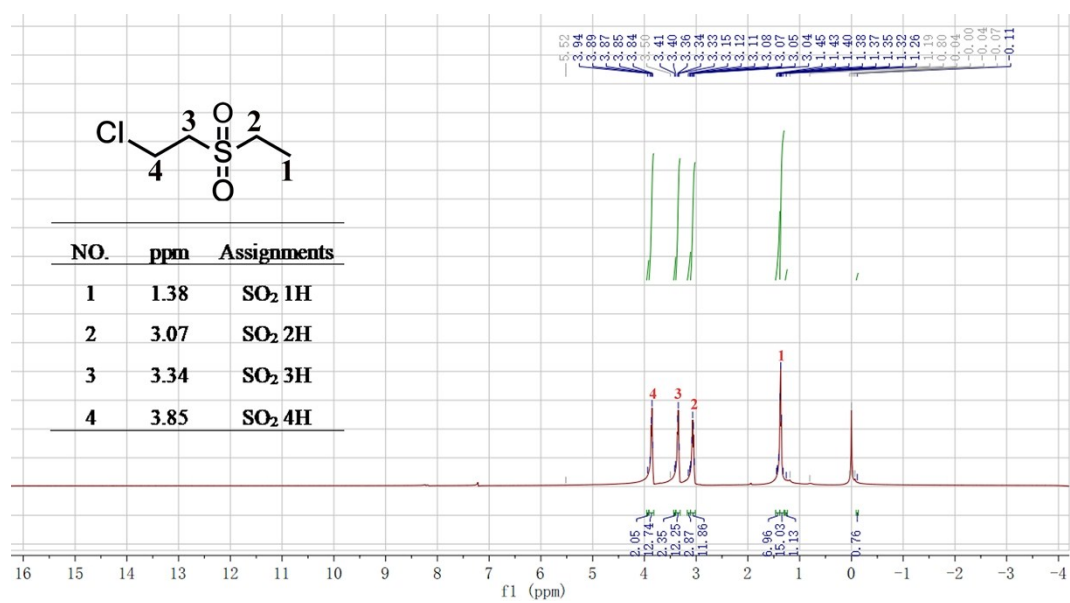

Fig. S19 <sup>1</sup>H NMR Data for CEESO<sub>2</sub>.

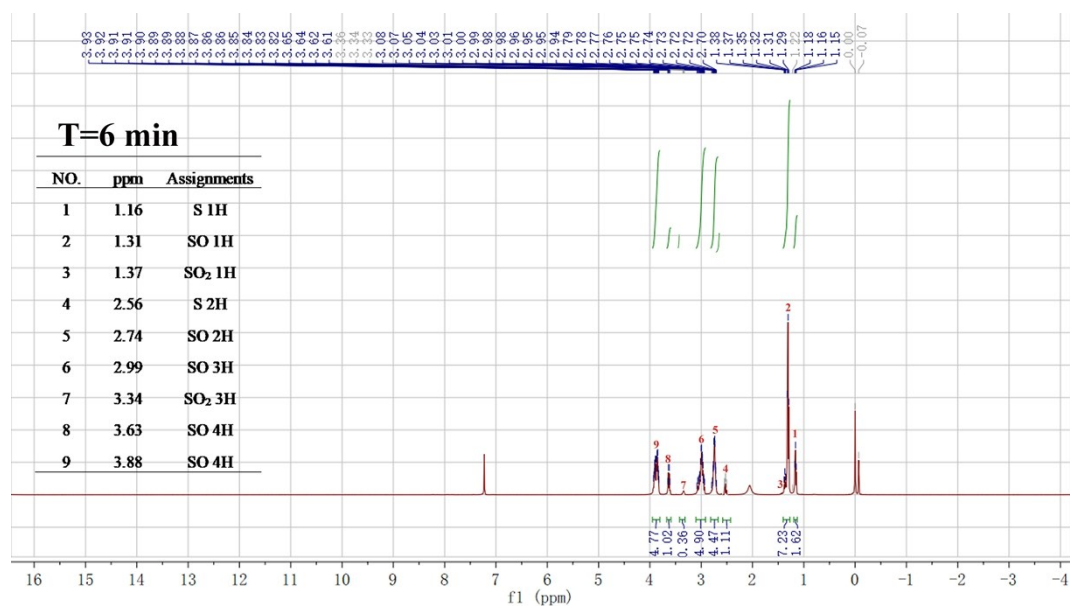

**Fig. S20 <sup>1</sup>H NMR Data for oxidation of CEES at 6 min.**

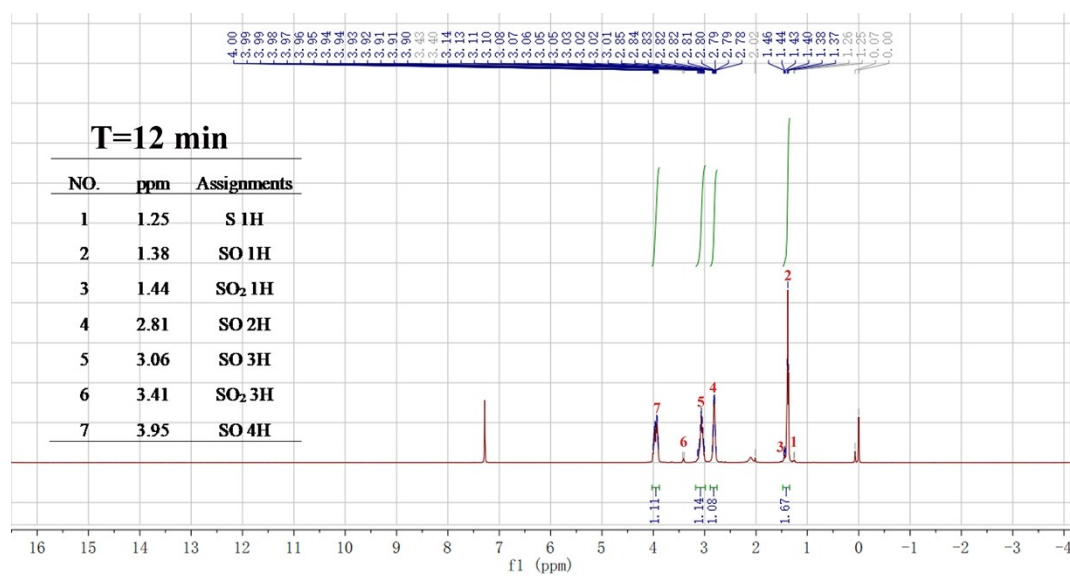

**Fig. S21 <sup>1</sup>H NMR Data for oxidation of CEES at 12 min.**

## VIII. Catalytic oxidation study for various organic sulfides

**Table S1.** Comparison of methyl phenyl sulfide oxidation in heterogeneous manner by different materials based on POMs in recent years

| catalysts                                                                                                               | Time (min) | Oxidant                       | Temperature (°C) | Conversion (%) | Sulfoxide selectivity (%) | refs      |
|-------------------------------------------------------------------------------------------------------------------------|------------|-------------------------------|------------------|----------------|---------------------------|-----------|
| <b>1</b>                                                                                                                | 20         | H <sub>2</sub> O <sub>2</sub> | 25               | 99             | 98.0%                     | This work |
| <b>2</b>                                                                                                                | 20         | H <sub>2</sub> O <sub>2</sub> | 25               | 96.3           | 97.1%                     | This work |
| <b>3</b>                                                                                                                | 20         | H <sub>2</sub> O <sub>2</sub> | 25               | 98.3           | 97.6%                     | This work |
| <b>4</b>                                                                                                                | 20         | H <sub>2</sub> O <sub>2</sub> | 25               | 97.3           | 97.4%                     | This work |
| {Cu <sub>3</sub> (ptz) <sub>4</sub> (Co <sub>2</sub> Mo <sub>10</sub> )}                                                | 240        | TBHP                          | 40               | 99             | 100                       | 33        |
| {[Cu(mIM) <sub>4</sub> ]V <sub>2</sub> O <sub>6</sub> }                                                                 | 240        | UHP                           | 40               | 98.7           | 100                       | 34        |
| V <sup>V</sup> <sub>17</sub> V <sup>IV</sup> <sub>12</sub> (C <sub>6</sub> H <sub>8</sub> O <sub>4</sub> ) <sub>8</sub> | 60         | TBHP                          | 25               | 98             | 91                        | 30        |
| P <sub>2</sub> W <sub>15</sub> -Al <sub>2</sub> O <sub>3</sub>                                                          | 35         | H <sub>2</sub> O <sub>2</sub> | 25               | 95             | 99                        | 25a       |
| PW <sub>12</sub> @Al-MCF <sub>en</sub>                                                                                  | 45         | H <sub>2</sub> O <sub>2</sub> | 25               | 100            | 92                        | 19        |
| {As <sub>4</sub> W <sub>40</sub> O <sub>140</sub> (Ru <sub>2</sub> (Ac) <sub>2</sub> )}                                 | 60         | H <sub>2</sub> O <sub>2</sub> | 50               | 97.4           | 87                        | 29a       |
| SBA-15/K <sub>6</sub> P <sub>2</sub> W <sub>18</sub> O <sub>62</sub>                                                    | 60         | H <sub>2</sub> O <sub>2</sub> | 25               | 96.9           | 98                        | 20        |
| PDDA-SiV <sub>2</sub> W <sub>10</sub>                                                                                   | 300        | H <sub>2</sub> O <sub>2</sub> | 25               | 100            | 91                        | 24        |



**Table S2.** Oxidation of 1-Methyl-4-(methylthio)benzene to the corresponding sulfoxide and sulfone. <sup>a</sup>Selectivity to sulfoxides, the byproduct was sulfone

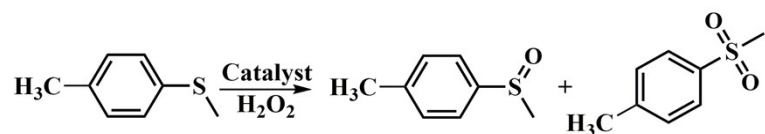

| Compound                                   | Time (min) | Con.(%) | Sel.(%) <sup>a</sup> |
|--------------------------------------------|------------|---------|----------------------|
| <b>1</b>                                   | 20         | 98.4    | 97.5                 |
| {CoAsMo <sub>6</sub> (PABA) <sub>3</sub> } | 20         | 96.2    | 91.4                 |
| {CoTeMo <sub>6</sub> (PABA) <sub>3</sub> } | 20         | 95.1    | 92.6                 |

Reaction conditions: 0.25 mmol 1-Methyl-4-(methylthio)benzene, 2.5 μmol material, 0.25 mmol naphthalene (internal standard), 0.3 mmol H<sub>2</sub>O<sub>2</sub> and 0.5 mL ethanol at room temperature for 20 min

**Table S3.** Oxidation of 1-Methoxy-4-(methylthio)benzene to the corresponding sulfoxide and sulfone. <sup>a</sup>Selectivity to sulfoxides, the byproduct was sulfone

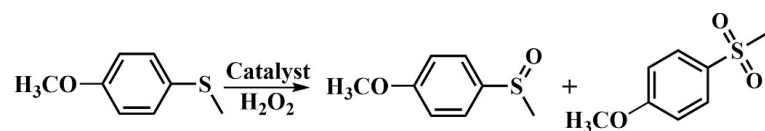

| Compound                                   | Time (min) | Con.(%) | Sel.(%) <sup>a</sup> |
|--------------------------------------------|------------|---------|----------------------|
| <b>1</b>                                   | 20         | 98      | 96.5                 |
| {CoAsMo <sub>6</sub> (PABA) <sub>3</sub> } | 20         | 95.4    | 92.1                 |
| {CoTeMo <sub>6</sub> (PABA) <sub>3</sub> } | 20         | 95      | 91.1                 |

Reaction conditions: 0.25 mmol 1-Methoxy-4-(methylthio)benzene, 2.5 μmol material, 0.25 mmol naphthalene (internal standard), 0.3 mmol H<sub>2</sub>O<sub>2</sub> and 0.5 mL ethanol at room temperature for 20 min

**Table S4.** Oxidation of 4-Chlorothioanisole to the corresponding sulfoxide and sulfone. <sup>a</sup>Selectivity to sulfoxides, the byproduct was sulfone

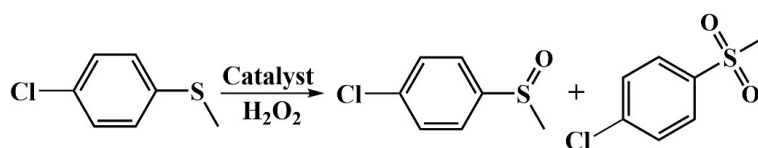

| Compound                                   | Time (min) | Con.(%) | Sel.(%) <sup>a</sup> |
|--------------------------------------------|------------|---------|----------------------|
| <b>1</b>                                   | 20         | 97.8    | 95.7                 |
| {CoAsMo <sub>6</sub> (PABA) <sub>3</sub> } | 20         | 95.1    | 92                   |
| {CoTeMo <sub>6</sub> (PABA) <sub>3</sub> } | 20         | 96      | 90                   |

Reaction conditions: 0.25 mmol 4-Chlorothioanisole, 2.5 μmol material, 0.25 mmol naphthalene (internal standard), 0.3 mmol H<sub>2</sub>O<sub>2</sub> and 0.5 mL ethanol at room temperature for 20 min

**Table S5.** Oxidation of 4-Fluorothioanisole to the corresponding sulfoxide and sulfone. <sup>a</sup>Selectivity to sulfoxides, the byproduct was sulfone

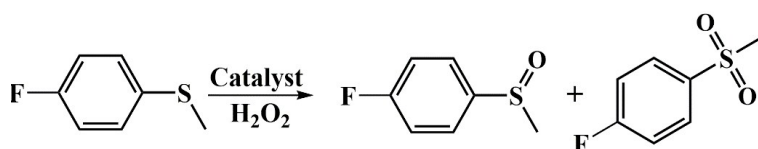

| Compound                                   | Time (min) | Con.(%) | Sel.(%) <sup>a</sup> |
|--------------------------------------------|------------|---------|----------------------|
| <b>1</b>                                   | 20         | 98.6    | 96.5                 |
| {CoAsMo <sub>6</sub> (PABA) <sub>3</sub> } | 20         | 94      | 89.0                 |
| {CoTeMo <sub>6</sub> (PABA) <sub>3</sub> } | 20         | 93.1    | 88.8                 |

Reaction conditions: 0.25 mmol 4-Fluorothioanisole, 2.5 μmol material, 0.25 mmol naphthalene (internal standard), 0.3 mmol H<sub>2</sub>O<sub>2</sub> and 0.5 mL ethanol at room temperature for 20 min

**Table S6.** Oxidation of benzyl sulfide to the corresponding sulfoxide and sulfone.<sup>a</sup>Selectivity to sulfoxides, the byproduct was sulfone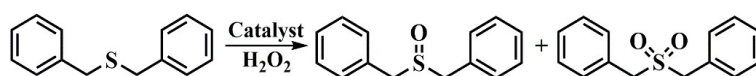

| Compound                                   | Time (min) | Con.(%) | Sel.(%) <sup>a</sup> |
|--------------------------------------------|------------|---------|----------------------|
| <b>1</b>                                   | 20         | 98.1    | 94.3                 |
| {CoAsMo <sub>6</sub> (PABA) <sub>3</sub> } | 20         | 95.1    | 87.9                 |
| {CoTeMo <sub>6</sub> (PABA) <sub>3</sub> } | 20         | 94.4    | 86.9                 |

Reaction conditions: 0.25 mmol benzyl sulfide, 2.5 μmol material, 0.25 mmol naphthalene (internal standard), 0.3 mmol H<sub>2</sub>O<sub>2</sub> and 0.5 mL ethanol at room temperature for 20 min

**Table S7.** Oxidation of phenyl sulfide to the corresponding sulfoxide and sulfone.<sup>a</sup>Selectivity to sulfoxides, the byproduct was sulfone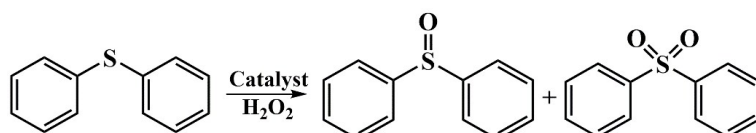

| Compound                                   | Time (min) | Con.(%) | Sel.(%) <sup>a</sup> |
|--------------------------------------------|------------|---------|----------------------|
| <b>1</b>                                   | 20         | 95.1    | 92.9                 |
| {CoAsMo <sub>6</sub> (PABA) <sub>3</sub> } | 20         | 90.7    | 87.5                 |
| {CoTeMo <sub>6</sub> (PABA) <sub>3</sub> } | 20         | 90      | 87                   |

Reaction conditions: 0.25 mmol phenyl sulfide, 2.5 μmol material, 0.25 mmol naphthalene (internal standard), 0.3 mmol H<sub>2</sub>O<sub>2</sub> and 0.5 mL ethanol at room temperature for 20 min

## IX. X-Ray Single Crystallography Result

**Table S8.** Crystal data and structure refinement for **1** and **2**

| Complex                                                            | <b>1</b>                                                                                                                         | <b>2</b>                                                                                                          |
|--------------------------------------------------------------------|----------------------------------------------------------------------------------------------------------------------------------|-------------------------------------------------------------------------------------------------------------------|
| formula                                                            | C <sub>42</sub> H <sub>99</sub> N <sub>6</sub> O <sub>83</sub> Mo <sub>12</sub> Cs <sub>4</sub> CoP <sub>2</sub> Na <sub>2</sub> | C <sub>42</sub> H <sub>103</sub> N <sub>6</sub> O <sub>85</sub> Mo <sub>12</sub> Cs <sub>4</sub> MnP <sub>2</sub> |
| formula weight                                                     | 3866.04                                                                                                                          | 3852.10                                                                                                           |
| T (K)                                                              | 293(2)                                                                                                                           | 293(2)                                                                                                            |
| crystal system                                                     | Triclinic                                                                                                                        | Triclinic                                                                                                         |
| space group                                                        | <i>P</i> -1                                                                                                                      | <i>P</i> -1                                                                                                       |
| a (Å)                                                              | 11.6777(7)                                                                                                                       | 11.7189(5)                                                                                                        |
| b (Å)                                                              | 12.4217(7)                                                                                                                       | 12.3672(5)                                                                                                        |
| c (Å)                                                              | 18.5662(12)                                                                                                                      | 18.6001(8)                                                                                                        |
| $\alpha$ (°)                                                       | 74.791(4)                                                                                                                        | 74.667(2)                                                                                                         |
| $\beta$ (°)                                                        | 85.539(4)                                                                                                                        | 85.523(2)                                                                                                         |
| $\gamma$ (°)                                                       | 84.253(4)                                                                                                                        | 84.148(2)                                                                                                         |
| U (Å <sup>3</sup> )                                                | 2582.0(3)                                                                                                                        | 2582.54(19)                                                                                                       |
| Z                                                                  | 1                                                                                                                                | 1                                                                                                                 |
| $\mu$ (mm <sup>-1</sup> )                                          | 2.486                                                                                                                            | 2.477                                                                                                             |
| reflections collected                                              | 9055                                                                                                                             | 9064                                                                                                              |
| independent reflections                                            | 7296                                                                                                                             | 7449                                                                                                              |
| R(int)                                                             | 0.0391                                                                                                                           | 0.0338                                                                                                            |
| GOF on F <sup>2</sup>                                              | 1.010                                                                                                                            | 1.028                                                                                                             |
| R <sub>1</sub> <sup>a</sup> [ <i>I</i> > 2 $\sigma$ ( <i>I</i> )]  | 0.0483                                                                                                                           | 0.0540                                                                                                            |
| wR <sub>2</sub> <sup>b</sup> [ <i>I</i> > 2 $\sigma$ ( <i>I</i> )] | 0.1208                                                                                                                           | 0.1509                                                                                                            |
| R <sub>1</sub> (all data)                                          | 0.0625                                                                                                                           | 0.0657                                                                                                            |
| wR <sub>2</sub> (all data)                                         | 0.1300                                                                                                                           | 0.1613                                                                                                            |

**Table S9.** Selected distances (Å) and angles (°) for **1** and **2**

| Compound 1      |          |                |          |
|-----------------|----------|----------------|----------|
| Mo(1)-O(14)     | 1.706(5) | Mo(2)-O(15)    | 2.230(6) |
| Mo(3)-O(18)     | 1.706(6) | Mo(4)-O(1)     | 2.311(6) |
| Mo(5)-O(9)      | 1.917(6) | Mo(6)-O(3)     | 2.300(5) |
| Co(1)-O(18)     | 2.150(7) | Co(1)-O(19)    | 2.137(7) |
| O(1)-P(1)-O(22) | 110.5(3) | O(1)-P(1)-O(3) | 109.5(3) |
| Compound 2      |          |                |          |
| Mo(1)-O(4)      | 1.709(7) | Mo(2)-O(21)    | 2.346(6) |
| Mo(3)-O(3)      | 1.717(7) | Mo(4)-O(1)     | 2.322(6) |
| Mo(5)-O(2)      | 2.308(6) | Mo(6)-O(21)    | 2.329(6) |
| Mn(1)-O(3)      | 2.127(8) | Mn(1)-O(4)     | 2.186(8) |
| O(21)-P(1)-O(2) | 110.3(3) | O(1)-P(1)-O(2) | 110.1(3) |

## **X. References**

- 1 a) G. M. Sheldrick, *SHELXL 97, Program for Crystal Structure Refinement, University of Göttingen, Germany, 1997*; b) G. M. Sheldrick, *SHELXL 97, Program for Crystal Structure Solution, University of Göttingen, Germany, 1997*.
